# Supplementary material for: The assembly effect: the connectedness between populations is a double‐edged sword for public health interventions
Source: Springer Nature journal article supplement (doi:10.1186/s12936-021-03726-x), 2021-04-17
Supplement: MOESM1 [file 19079378]

1 Supplementary materials for “The assembly effect: the connectedness between populations  
2 is a double-edged sword for public health interventions”

### 3 Table of Contents

|    |                                                  |    |
|----|--------------------------------------------------|----|
| 4  | List of Authors .....                            | 2  |
| 5  | Methods .....                                    | 2  |
| 6  | Model structure .....                            | 2  |
| 7  | Model validation .....                           | 3  |
| 8  | Figures .....                                    | 5  |
| 9  | Tables .....                                     | 8  |
| 10 | Table 1: Parameter values and descriptions ..... | 9  |
| 11 | References .....                                 | 10 |

12

13

## 14 List of Authors

15 Sai Thein Than Tun, Daniel M. Parker, Ricardo Aguas, Lisa J. White

16

## 17 Methods

### 18 Model structure

19 The general model structure for a patch can be seen in Figure 1 which is mathematically represented by the set  
20 of equations below.

$$21 \quad \frac{dS_i}{dt} = \mu P_i - \mu_{out} S_i + \omega R_i - \lambda_i S_i + \omega_D S_{Di} - m_i S_i$$

$$22 \quad \frac{dI_{Ci}}{dt} = \mu_C P_i - \mu_{out} I_{Ci} + p_S(1 - \tau) \lambda_i S_i + p_R(1 - \tau) \lambda_i R_i + p_R(1 - \tau) \lambda_i I_{Ui} + p_R(1 - \tau) \lambda_i I_{Ai} - v_C I_{Ci} - m_i I_{Ci}$$

$$23 \quad \frac{dI_{Ai}}{dt} = \mu_A P_i - \mu_{out} I_{Ai} + (1 - p_S) \lambda_i S_i + (1 - p_R) \lambda_i R_i + (1 - p_R) \lambda_i I_{Ui} - p_R \lambda_i I_{Ai} + v_C I_{Ci} - v_A I_{Ai} + f v_T T_i$$

$$24 \quad - m_i I_{Ai}$$

$$25 \quad \frac{dI_{Ui}}{dt} = \mu_U P_i - \mu_{out} I_{Ui} - \lambda_i I_{Ui} - v_U I_{Ui} + v_A I_{Ai} - m_i I_{Ui}$$

$$26 \quad \frac{dR_i}{dt} = -\mu_{out} R_i - \omega R_i - \lambda_i R_i + v_U I_{Ui} + \omega_D R_{Di} - m_i R_i$$

$$27 \quad \frac{dT_i}{dt} = -\mu_{out} T_i + p_S \tau \lambda_i S_i + p_R \tau \lambda_i R_i + p_R \tau \lambda_i I_{Ui} + p_R \tau \lambda_i I_{Ai} - v_T T_i + m_i (I_{Ci} + I_{Ai} + I_{Ui})$$

$$28 \quad \frac{dS_{Di}}{dt} = -\mu_{out} S_{Di} + \omega R_{Di} - \omega_D S_{Di} + m_i S_i$$

$$29 \quad \frac{dR_{Di}}{dt} = -\mu_{out} R_{Di} - \omega R_{Di} + (1 - f) v_T T_i - \omega_D R_{Di} + m_i (R_i)$$

30

31 where  $P_i = S_i + S_{Di} + I_{Ci} + I_{Ai} + I_{Ui} + R_i + R_{Di} + T_i$ .

32 The description and assumed values of the parameters can be found in Table 1.

33

The two patches are connected through the  $\lambda$  term (see Figure 1 in the main manuscript) which is influenced by the level of connectedness,  $C$ , as described by the equation below.

$$\lambda_i = (1 - C) \beta_i \left( \frac{I_i}{P_i} \right) + \frac{C (\beta_1 + \beta_2) (I_1 + I_2)}{2 (P_1 + P_2)}$$

Where  $C \in (0,1)$ .

Therefore, when  $C=0$ ,

$$\lambda_1 = \beta_1 \left( \frac{I_1}{P_1} \right), \lambda_2 = \beta_2 \left( \frac{I_2}{P_2} \right)$$

And when  $C=1$ ,

$$\lambda_1 = \lambda_2 = \frac{0.5(\beta_1 + \beta_2)(I_1 + I_2)}{P_1 + P_2}$$

For brevity, all the sub-compartments of  $I$  are not shown in the equation.  $\beta$  is the contact rate between mosquito and human, adjusted by the effectiveness and coverage parameters of insecticide treated nets ( $\zeta_{ITN}, \kappa_{ITN}$ ).

Coverage and effect of early diagnosis and treatment is modelled through the parameter  $\tau$ . Mass drug

administration (MDA) is modelled for three months during which  $m_i = -\frac{\ln(1-\kappa_{m_i})}{3}$ .  $m_i$  moves individuals from  $S$  and  $R$  to their respective compartments with active drug, and individuals from  $I$  to  $T$  (Figure 2).

## Model validation

The parameters for the model are calibrated based on the data from Parker et al.<sup>2</sup> In order to do so, we simulated a scenario with the MDA coverages corresponding to the two parts of the village as in <sup>2</sup>. Human biting rate and the size of the patches were assumed to be the same.

In the result of this scenario analysis (Figure 3), the red line indicates that no elimination threshold would be achieved in the part of the village with lower MDA coverage (64%), at all level of connectedness. But because the two patches were from a single village, the connectedness would be close to 100%. At this connectedness

62 level, both parts of the village will not achieve the elimination threshold. Therefore, the model can explain why  
63 there were clinical cases throughout the village 12 months after the completion of the MDA. Table 1 lists of all  
64 other model parameter values.

65

66

## Figures

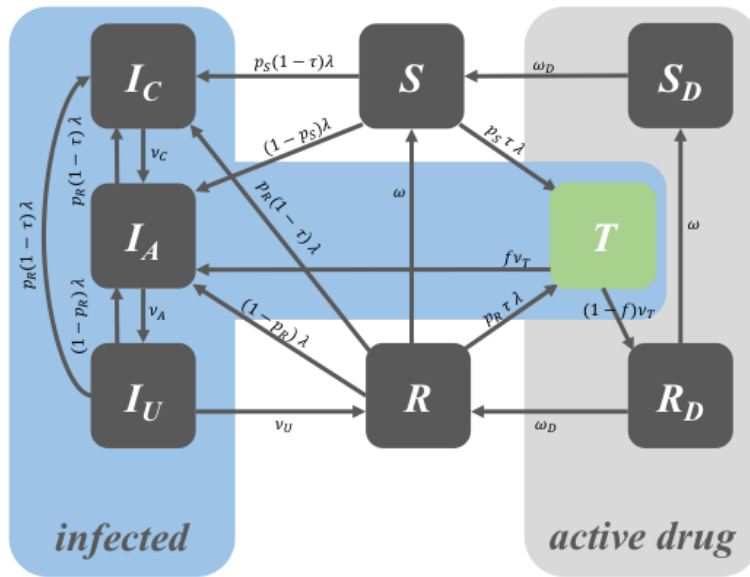

Figure 1: General structure of the compartmental model. Reproduced from our previous manuscript Tun et al. 2017

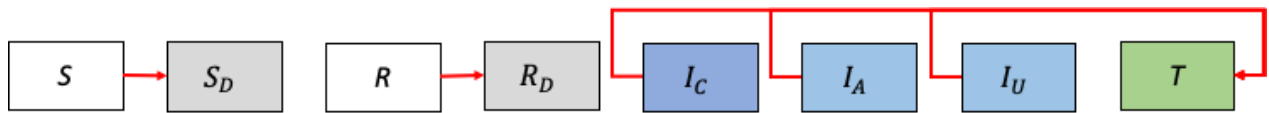

Figure 2: Consequence of MDA, revised from Tun et al 2017

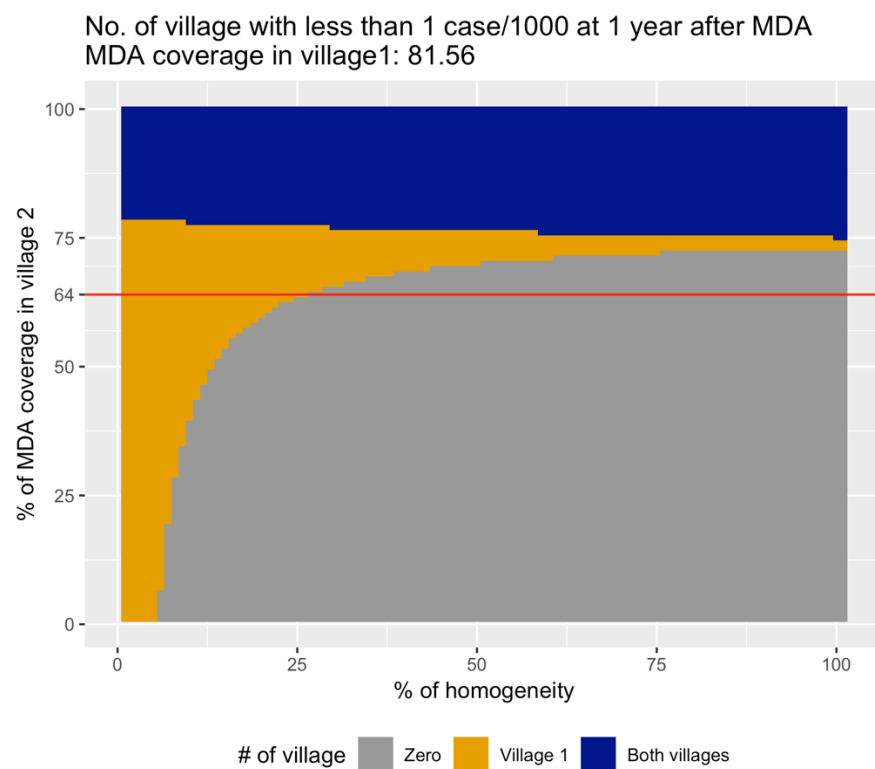

75

76 *Figure 3: Result of the model calibration based on Parker et al. 2019*

77

78

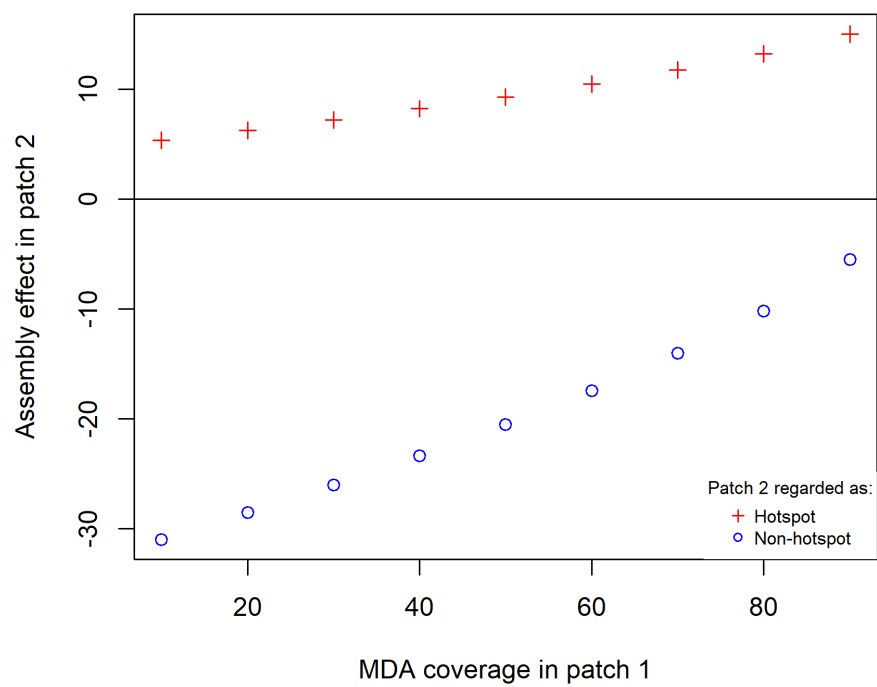

79

80

81 *Figure 4: Assembly effects between a hotspot and a non-hotspot. The non-hotspot has 25% lower pre-intervention incidence*

82 *compared to the hotspot.*

## Tables

| #  | Name            | Description                                                                                                   | Value   | Unit       | Reference    |
|----|-----------------|---------------------------------------------------------------------------------------------------------------|---------|------------|--------------|
| 1  | $\zeta_{ITN}$   | Effectiveness of ITN (insecticide treated nets), proportion of new infections averted due to ownership of ITN | 0.30    | proportion | <sup>3</sup> |
| 2  | $\kappa_{ITN}$  | Coverage of ITN                                                                                               | 0.70    | proportion | -            |
| 3  | $\kappa_{MSAT}$ | Coverage of MSAT to prevent case importation from other areas                                                 | 0.90    | proportion | -            |
| 4  | $\mu$           | Birth/death rate                                                                                              | 1/69    | /year      | <sup>4</sup> |
| 5  | $\mu_A$         | Rate of importation of asymptomatic patent cases from other areas                                             | 1       | /year/1000 | -            |
| 6  | $\mu_C$         | Rate of importation of clinical cases from other areas                                                        | 1       | /year/1000 | -            |
| 7  | $\mu_{out}$     | Death rate + emigration rates for malaria cases                                                               | -       | -          | -            |
| 8  | $\mu_U$         | Rate of importation of asymptomatic non-patent cases from other areas                                         | 1       | /year/1000 | -            |
| 9  | $\nu_A$         | Rate of transition from asymptomatic patent state (IA) to asymptomatic non-patent state (IU)                  | 365/60  | /year      | <sup>5</sup> |
| 10 | $\nu_C$         | Rate of relief from clinical symptoms in absence of treatment                                                 | 365/3   | /year      | <sup>6</sup> |
| 11 | $\nu_U$         | Rate of transition from asymptomatic non-patent state (IU) to recovered state (R)                             | 365/100 | /year      | <sup>7</sup> |
| 12 | $\nu_T$         | Recovery rate after treatment with anti-malarial drug                                                         | 365/14  | /year      | <sup>8</sup> |
| 13 | $\xi_A$         | Sensitivity of the detecting an asymptomatic, patent (microscopically detectable) case with MSAT              | 0.87    | proportion | -            |
| 14 | $\xi_C$         | Sensitivity of the detecting a Clinical case with MSAT                                                        | 0.99    | proportion | -            |
| 15 | $\xi_U$         | Sensitivity of the detecting an asymptomatic, non-patent (microscopically undetectable) case with MSAT        | 0.44    | proportion | <sup>9</sup> |



|    |            |                                                                                                     |               |            |               |
|----|------------|-----------------------------------------------------------------------------------------------------|---------------|------------|---------------|
| 16 | $\rho_A$   | Relative infectivity of super-microscopic asymptomatic infections compared with clinical infections | 0.55          | proportion | <sup>10</sup> |
| 17 | $\rho_U$   | Relative infectivity of sub-microscopic asymptomatic infections compared with clinical infections   | 0.17          | proportion | <sup>10</sup> |
| 18 | $\omega$   | Rate of immunity loss                                                                               | $\frac{1}{2}$ | /year      | -             |
| 19 | $\omega_D$ | Rate of loss of protection by anti-malarial drug                                                    | 365/30        | /year      | -             |
| 20 | $p_R$      | Proportion of all immune new infections that are clinical                                           | 0.20          | proportion | <sup>11</sup> |
| 21 | $p_S$      | Proportion of all non-immune new infections that are clinical                                       | 0.90          | proportion | <sup>5</sup>  |
| 22 | $f$        | Proportion of failed treatment                                                                      | 0.05-0.30     | proportion | -             |

Table 1: Parameter values and descriptions

## References

- 1 Tun STT, von Seidlein L, Pongvongsa T, *et al.* Towards malaria elimination in Savannakhet, Lao PDR: mathematical modelling driven strategy design. *Malaria Journal* 2017; **16**: 483.
- 2 Parker DM, Tun STT, White LJ, *et al.* Potential herd protection against *Plasmodium falciparum* infections conferred by mass antimalarial drug administrations. *eLife* 2019; **8**: e41023.
- 3 Sochantha T, Hewitt S, Nguon C, *et al.* Insecticide-treated bednets for the prevention of *Plasmodium falciparum* malaria in Cambodia: a cluster-randomized trial. *Trop Med Int Health* 2006; **11**: 1166–77.
- 4 WHO. Life expectancy and Healthy life expectancy: Data by WHO region.  
<http://apps.who.int/gho/data/view.main.SDG2016LEXREGv?lang=en> (accessed Oct 29, 2019).
- 5 Collins WE, Jeffery GM. A retrospective examination of sporozoite- and trophozoite-induced infections with *Plasmodium falciparum*: development of parasitologic and clinical immunity during primary infection. *Am J Trop Med Hyg* 1999; **61**: 4–19.
- 6 Church LW, Le TP, Bryan JP, *et al.* Clinical manifestations of *Plasmodium falciparum* malaria experimentally induced by mosquito challenge. *J Infect Dis* 1997; **175**: 915–20.
- 7 Eyles DE, Young MD. The duration of untreated or inadequately treated *Plasmodium falciparum* infections in the human host. *J Natl Malar Soc* 1951; **10**: 327–36.
- 8 Adjuik M, Babiker A, Garner P, *et al.* Artesunate combinations for treatment of malaria: meta-analysis. *Lancet* 2004; **363**: 9–17.
- 9 Das S, Jang IK, Barney B, *et al.* Performance of a High-Sensitivity Rapid Diagnostic Test for *Plasmodium falciparum* Malaria in Asymptomatic Individuals from Uganda and Myanmar and Naive Human Challenge Infections. *Am J Trop Med Hyg* 2017; published online Aug 7. DOI:10.4269/ajtmh.17-0245.

- 10 Slater HC, Ross A, Ouédraogo AL, *et al.* Assessing the impact of next-generation rapid diagnostic tests on *Plasmodium falciparum* malaria elimination strategies. *Nature* 2015; **528**: S94-101.
- 11 Collins WE, Jeffery GM. A retrospective examination of secondary sporozoite- and trophozoite-induced infections with *Plasmodium falciparum*: development of parasitologic and clinical immunity following secondary infection. *Am J Trop Med Hyg* 1999; **61**: 20–35.
